# Supplementary material for: The impact of Sahara dust aerosols on the three-dimensional structure of precipitation systems of different sizes in spring
Source: Copernicus journal article supplement (doi:10.5194/egusphere-2025-2799), 2025-08-18

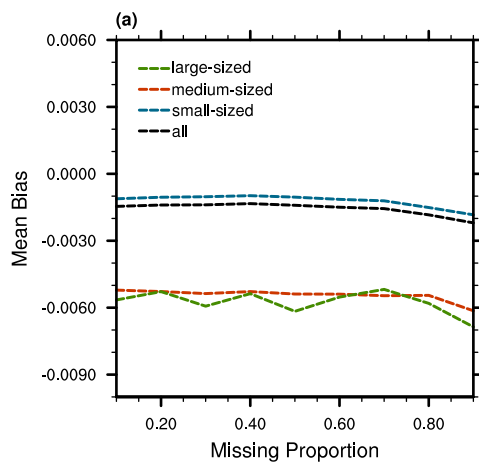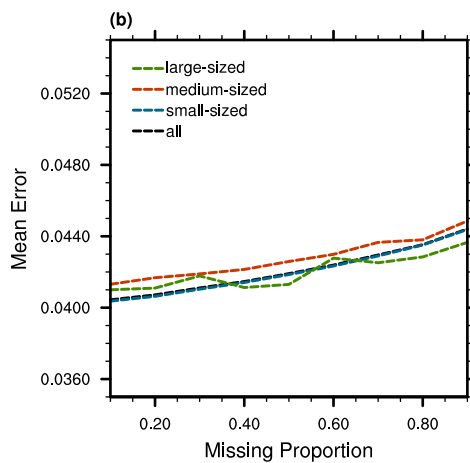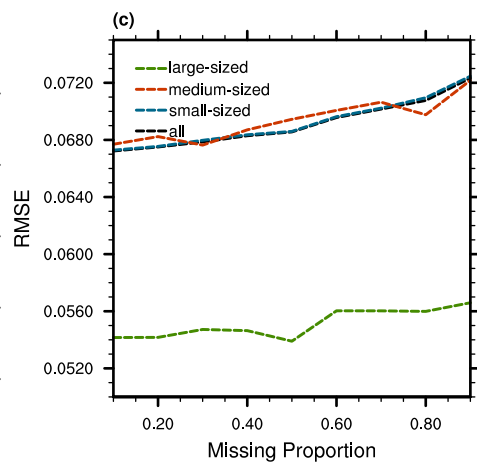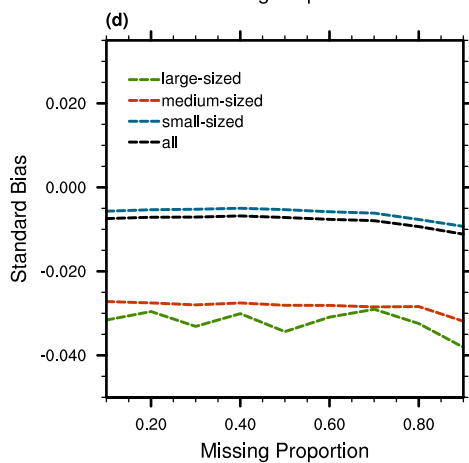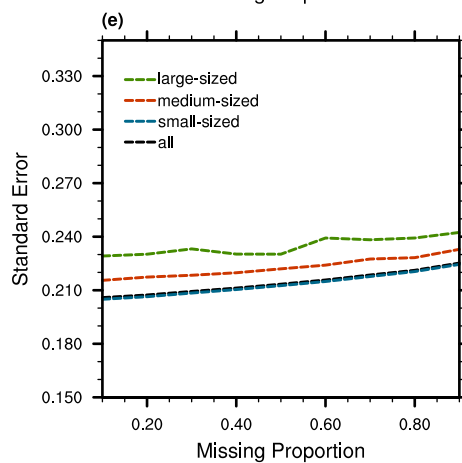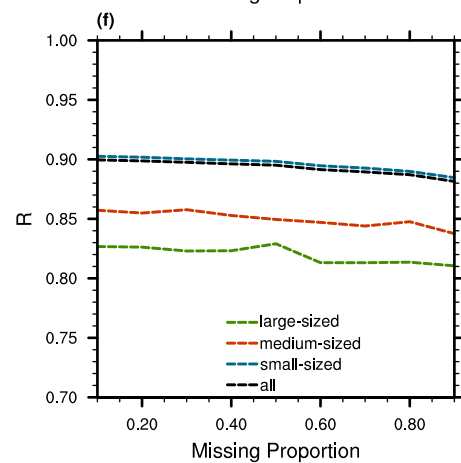

Supplement: Supplementary file [file Figure 3.pdf › Supplement of Reply on CC1/Figure 3.pdf]
